# Supplementary material for: Echocardiographic Findings and Subsequent Risk of Native Valve Endocarditis
Source: Preprints.org preprint supplement (doi:10.20944/preprints202401.0995.v1), 2024-01-12
Supplement: Supplementary file 1 [file supplementary]

Supplemental Material

Table S1: Model-Predicted Risk of LS-NVE for 10 Hypothetical Patients

| **Pt** | **IVSDT** | **LVESD** | **EF** | **LVPWDT** | **Aortic Regurg.** | **Mitral Regurg.** | **LVOT Velocity** | **LV Cardiac Index** | **Medial E:e’** | **AVSP Velocity** | **Predicted Risk** | **95% Confidence Interval** |
| --- | --- | --- | --- | --- | --- | --- | --- | --- | --- | --- | --- | --- |
| 1 | 10 | 32 | 61 | 8 | Mild-Severe | None/Trivial | 1.2 | 3.2 | 6.7 | 1.2 | 29.5% | 14.7%-53.6% |
| 2 | 8 | 33 | 65 | 7 | Mild-Severe | Mild-Severe | 1.2 | 2.8 | 6.8 | 1.1 | 18.2% | 7.1%-42.1% |
| 3 | 10 | 30 | 62 | 9 | None/Trivial | None/Trivial | 1.1 | 3 | 10 | 1.4 | 42.7% | 31.8%-55.5% |
| 4 | 9 | 30 | 63 | 10 | None/Trivial | None/Trivial | 1.1 | 3.5 | 8.2 | 1.4 | 37.1% | 25.2%-52.3% |
| 5 | 10 | 31 | 64 | 11 | None/Trivial | None/Trivial | 1.1 | 2.8 | 10 | 1.5 | 52.3% | 39.5%-66.3% |
| 6 | 9 | 28 | 60 | 10 | Mild-Severe | Mild-Severe | 1 | 3.1 | 7.5 | 1.6 | 17.3% | 8.2%-34.4% |
| 7 | 8 | 31 | 58 | 9 | None/Trivial | Mild-Severe | 0.9 | 3 | 8.7 | 1.3 | 12.8% | 6.2%-25.5% |
| 8 | 12 | 28 | 57 | 8 | Mild-Severe | None/Trivial | 1.3 | 3.1 | 9 | 1.6 | 29.8% | 12.5%-60.9% |
| 9 | 10 | 25 | 55 | 9 | None/Trivial | Mild-Severe | 1 | 3.2 | 8.5 | 1.3 | 18.6% | 9.8%-33.6% |
| 10 | 10 | 29 | 55 | 12 | None/Trivial | Mild-Severe | 1.1 | 3 | 8.6 | 1.4 | 36.3% | 19.3%-61.2% |
| Predicted risk estimates and 95% CIs are stated in terms of the matched sample and therefore do not represent the risk of LS-NVE in the population. | | | | | | | | | | | | |

Figure S1: Logistic Regression Equation for Risk of LS-NVE

Prob{Y=“Case”} = 1 / ( 1+ exp(- *Ⅹ β* ) , where

*Ⅹ β =*

-18.116 + 0.045835∙LVESD + 0.099393∙LVPWDT - 0.34641∙(AR= “Mild to Severe”) - 0.042453∙(MR= “Mild to Severe”) +

2.2858∙log(IVSDT) - 13.709∙(log(IVSDT) - 2.1972)3 + 25.116∙(log(IVSDT) - 2.3979)3 - 11.407∙(log(IVSDT) - 2.6391)3 +

0.09037∙LVEF – 0.00009805∙(LVEF-46.8)3 + 0.0002721∙(LVEF-61)3 - 0.0001740∙(LVEF69) 3 +

3.8708∙LVOT vel - 13.626∙(LVOT vel-0.9)3 + 22.71∙(LVOT vel-1.1)3 - 9.0838∙(LVOT vel-1.4)3

+ 0.052538∙LV cardiac index + 0.5282∙log(medial E:e’) + 0.23038∙log(AVSP velocity)

The model equation above is based on original regression coefficients and can be used to estimate LS-NVE “risk” (i.e., predicted probability of developing LS-NVE) relative to the matched sample on which the model was derived.

Although matching resulted in an even distribution of CCI scores between the 2 groups, the matched cases had significantly higher rates of diabetes mellitus and chronic kidney disease. We addressed this residual confounding by performing a secondary analysis in which terms for diabetes mellitus and chronic kidney disease were added to the original model. This yielded similar findings concerning echocardiographic variables, except for medial E: e’ which was no longer significant. In this appended model, “hemodynamic” measures (corrected χ² = 29.3) again outperformed the “anatomical” factors (corrected χ² = 8.5) in addition to the “comorbidities” (corrected χ² = 19.3) (Supplemental Figure 2). To further investigate the robustness of the main results, we re-fit the original logistic regression model ignoring the matching in the analysis (unconditional logistic regression). As presented in Supplemental Figure 3, this unmatched analysis had similar model χ² values for each of the 10 variables (in the same order of importance) and identified the same 3 significant variables as the matched analysis.

Supplemental Figure 2. Secondary model Relative Importance of Individual and Grouped Predictor Variables.


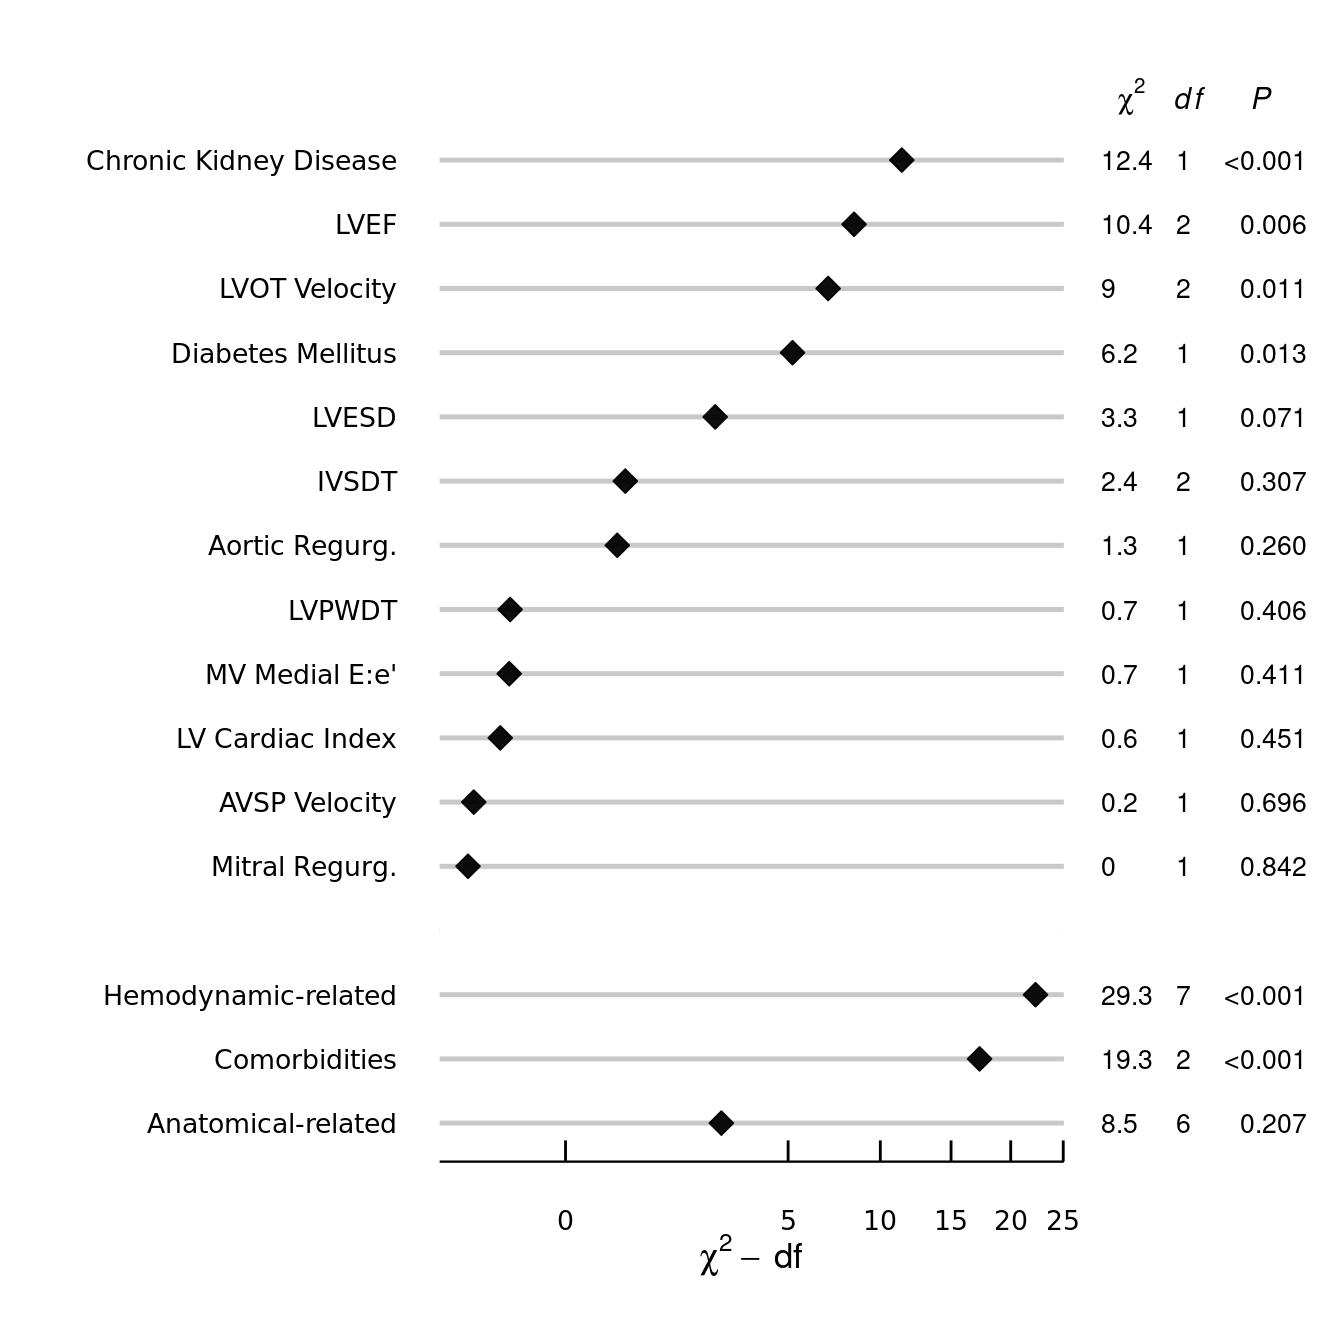


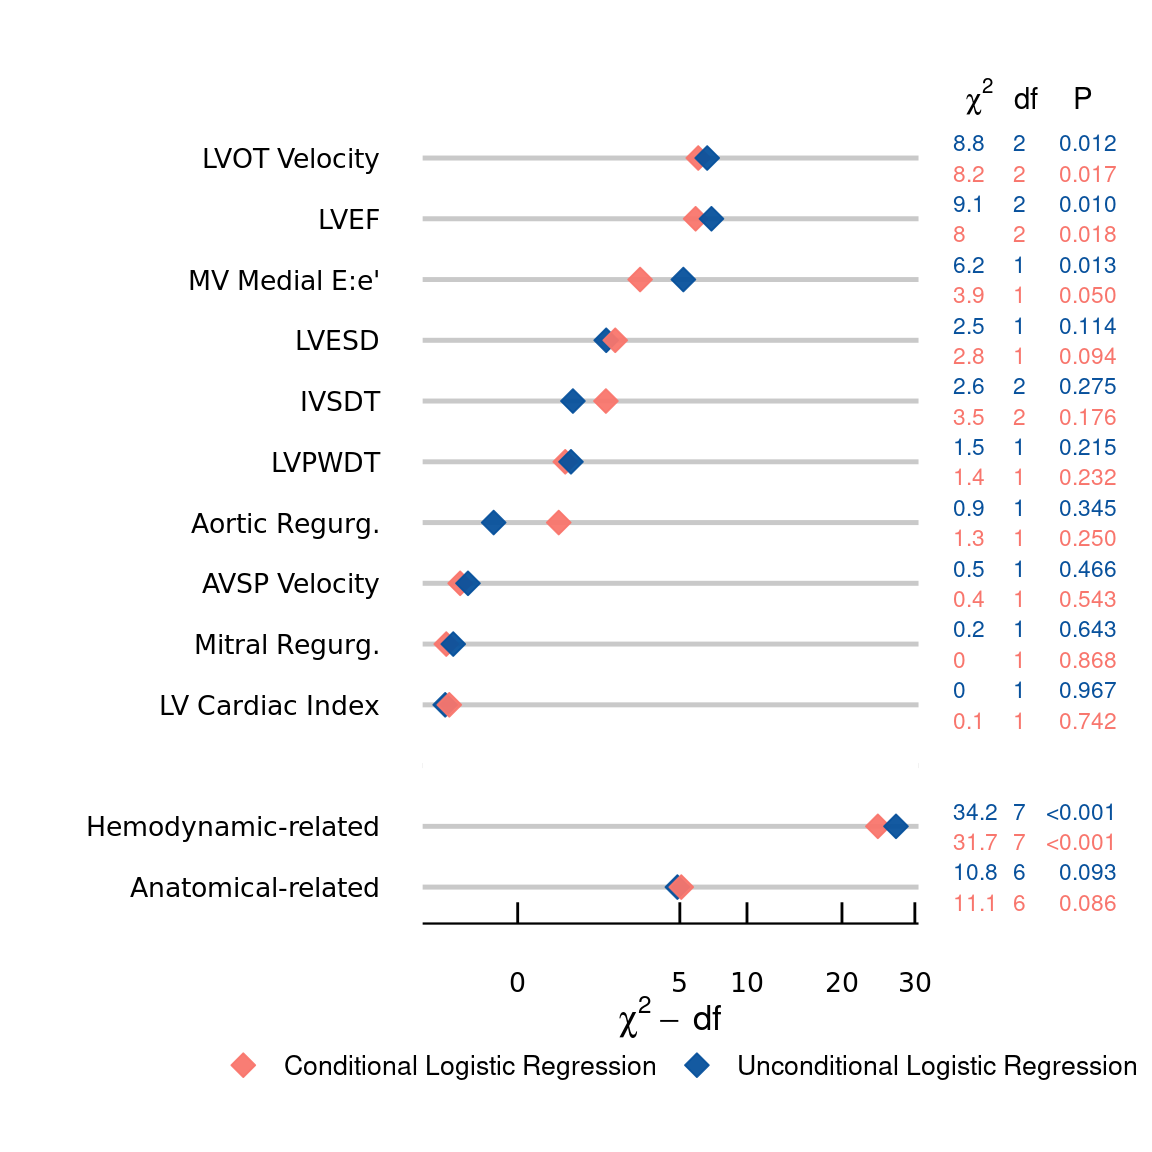
Supplemental Figure 3. Conditional versus Unconditional Logistic Regression
